# Supplementary material for: Cobalt(ii) containing liquid metal salts for electrodeposition of cobalt and electrochemical nanoparticle formation
Source: Royal Society of Chemistry journal article supplement (doi:10.1039/c7dt02604h), 2017-01-01
Supplement: c7dt02604h1.pdf [file c7dt02604h1.pdf]

## **Supporting information for the manuscript: Cobalt(II) containing liquid metal salts for electrodeposition of cobalt and electrochemical nanoparticle formation**

Jeroen Sniekers,<sup>a</sup> Pieter Geysens,<sup>a</sup> João C. Malaquias,<sup>b</sup> Tom Vander Hoogerstraete,<sup>a</sup>  
Luc Van Meervelt,<sup>a</sup> Jan Fransaer<sup>b</sup>, Koen Binnemans<sup>\*a</sup>

# 1 Synthesis

## 1.1 $\text{Co}(\text{Tf}_2\text{N})_2 \cdot 6\text{H}_2\text{O}$

A solution of cobalt(II) carbonate (2.737 g, 23.01 mmol) and hydrogen bistriflimide (80 wt% aqueous solution) (12.50 g, 35.57 mmol) in  $\text{H}_2\text{O}$  (50 mL) was stirred at room temperature until the pH was neutral.  $\text{CO}_2$  was released during the reaction. The remaining solids were filtered off and the excess of solvent was removed on a rotary evaporator after which the product was dried overnight at 50 °C on a vacuum line to yield  $[\text{Co}(\text{H}_2\text{O})_6][\text{Tf}_2\text{N}]_2$  as a pink crystalline solid (yield 13.05 g; 78 %). FTIR (ATR,  $\nu_{\text{max}}/\text{cm}^{-1}$ ): 3492 ( $\text{H}_2\text{O}$ ), 1636, 1348 ( $\text{SO}_2$ ), 1312 ( $\text{SO}_2$ ), 1196 ( $\text{CF}_3$ ), 1129 ( $\text{SO}_2$ ), 1038 (SNS), 799 (CS), 770 (SNS), 746 ( $\text{CF}_3$ ), 614 ( $\text{SO}_2$ ), 570 ( $\text{CF}_3$ ), 511 ( $\text{CF}_3$ ). CHN found (calculated for  $\text{C}_4\text{H}_{12}\text{CoF}_{12}\text{N}_2\text{O}_{14}\text{S}_4$ ): C 6.64 (6.61) %, H 1.89 (1.66) %, N 3.76 (3.85) %.

## 1.2 $[\text{Co}(\text{MeIm})_6][\text{Tf}_2\text{N}]_2$

A solution of  $\text{Co}(\text{Tf}_2\text{N})_2 \cdot 6\text{H}_2\text{O}$  (1.00 g, 1.38 mmol) and *N*-methylimidazole (0.68 g, 8.32 mmol) in ethanol (25 mL) was stirred for 5 min at room temperature. The excess of ethanol was removed on a rotary evaporator and the product was dried overnight on a vacuum line, yielding a pale pink solid product (yield 1.46 g; 95 %). Melting point: 137 °C. FTIR (ATR,  $\nu_{\text{max}}/\text{cm}^{-1}$ ): 3140 (CH), 2968 (CH), 1532 (ring), 1519 (ring), 1425 (ring), 1349 ( $\text{SO}_2$ ), 1332 (ring), 1287 (CH), 1174 ( $\text{CF}_3$ ), 1139 ( $\text{SO}_2$ ), 1107 (ring), 1088 (CH), 1052 (SNS), 937 (ring), 830 (CH), 791 (CS), 755 (CH), 744 ( $\text{CF}_3$ ), 662 (ring), 609 (ring), 569 ( $\text{CF}_3$ ), 513 ( $\text{CF}_3$ ), 409 ( $\text{SO}_2$ ). CHN found (calculated for  $\text{C}_{28}\text{H}_{36}\text{CoF}_{12}\text{N}_{14}\text{O}_8\text{S}_4$ ): C 30.28 (30.25) %, H 3.43 (3.26) %, N 17.40 (17.64) %.

## 1.3 $[\text{Co}(\text{EtIm})_6][\text{Tf}_2\text{N}]_2$

A solution of  $\text{Co}(\text{Tf}_2\text{N})_2 \cdot 6\text{H}_2\text{O}$  (1.00 g, 1.38 mmol) and *N*-ethylimidazole (0.80 g, 8.32 mmol) in ethanol (25 mL) was stirred for 5 min at room temperature. The excess of ethanol was removed on a rotary evaporator and the product was dried overnight on a vacuum line, yielding a pale pink solid product (yield 1.68 g; 99 %). Melting point: 83 °C. FTIR (ATR,  $\nu_{\text{max}}/\text{cm}^{-1}$ ): 3139 (CH), 2984 (CH), 1522 (ring), 1470 (ring), 1457 (ring), 1405 (ring), 1345 ( $\text{SO}_2$ ), 1321 (ring), 1289 (CH), 1232 ( $\text{CF}_3$ ), 1144 ( $\text{SO}_2$ ), 1132 ( $\text{SO}_2$ ), 1113 (ring), 1093 (CH), 1059 (SNS), 1034, 964, 933 (ring), 843 (CH), 788 (CS), 761, 752 (CH), 741 ( $\text{CF}_3$ ), 665 (ring), 651 (ring), 620 (ring), 597, 570 ( $\text{CF}_3$ ), 529 ( $\text{CF}_3$ ), 505 ( $\text{CF}_3$ ), 443 ( $\text{CF}_3$ ). CHN found (calculated for  $\text{C}_{34}\text{H}_{52}\text{CoF}_{12}\text{N}_{14}\text{O}_{10}\text{S}_4$ ): C 33.11 (33.15) %, H 4.45 (4.25) %, N 15.99 (15.92) %.

## 1.4 $[\text{Co}(\text{PrIm})_6][\text{Tf}_2\text{N}]_2$

A solution of  $\text{Co}(\text{Tf}_2\text{N})_2 \cdot 6\text{H}_2\text{O}$  (1.00 g, 1.38 mmol) and *N*-propylimidazole (0.92 g, 8.32 mmol) in ethanol (25 mL) was stirred for 5 min at room temperature. The excess of ethanol was removed on a rotary evaporator and the product was dried overnight on a vacuum line, yielding a pale pink solid product (yield 1.73 g; 98 %). Melting point: 32 °C. FTIR (ATR,  $\nu_{\text{max}}/\text{cm}^{-1}$ ): 3136 (CH), 2970 (CH), 2942 (CH), 2883 (CH), 1525 (ring), 1514 (ring), 1460 (ring), 1405 (ring), 1341 ( $\text{SO}_2$ ), 1330 (ring), 1283 (CH), 1229 ( $\text{CF}_3$ ), 1180 ( $\text{CF}_3$ ), 1133 ( $\text{SO}_2$ ), 1105 (ring), 1087 (CH), 1060 (SNS), 937 (ring), 901, 855, 844 (CH), 826, 788 (CS), 760 (CH), 739 ( $\text{CF}_3$ ), 665 (ring), 652 (ring), 633 (ring), 596, 569 ( $\text{CF}_3$ ), 505 ( $\text{CF}_3$ ), 438, 405 ( $\text{SO}_2$ ). CHN found (calculated for  $\text{C}_{40}\text{H}_{60}\text{CoF}_{12}\text{N}_{14}\text{O}_8\text{S}_4$ ): C 37.32 (37.53) %, H 3.64 (3.91) %, N 15.23 (15.32) %.

### 1.5 [Co(BuIm)<sub>6</sub>][Tf<sub>2</sub>N]<sub>2</sub>

A solution of Co(Tf<sub>2</sub>N)<sub>2</sub>·6H<sub>2</sub>O (1.00 g, 1.38 mmol) and *N*-butylimidazole (1.04 g, 8.32 mmol) in ethanol (25 mL) was stirred for 5 min at room temperature. The excess of ethanol was removed on a rotary evaporator and the product was dried overnight on a vacuum line, yielding a pale pink solid product (yield 99 %). Melting point: 60 °C. FTIR (ATR,  $\nu_{\text{max}}/\text{cm}^{-1}$ ): 3132 (CH), 2964 (CH), 2937 (CH), 2879 (CH), 1516 (ring), 1464 (ring), 1349 (SO<sub>2</sub>), 1333 (ring), 1280 (CH), 1226 (CF<sub>3</sub>), 1189 (CF<sub>3</sub>), 1139 (SO<sub>2</sub>), 1108 (ring), 1093 (CH), 1051 (SNS), 1034 (SNS), 937 (ring), 830 (CH), 792 (CS), 762 (CH), 736 (CF<sub>3</sub>), 664 (ring), 609, 569 (CF<sub>3</sub>), 513 (CF<sub>3</sub>), 409 (SO<sub>2</sub>). CHN found (calculated for C<sub>46</sub>H<sub>72</sub>CoF<sub>12</sub>N<sub>14</sub>O<sub>8</sub>S<sub>4</sub>): C 40.26 (40.50) %, H 5.13 (5.32) %, N 14.29 (14.37) %.

### 1.6 [Co(PeIm)<sub>6</sub>][Tf<sub>2</sub>N]<sub>2</sub>

A solution of Co(Tf<sub>2</sub>N)<sub>2</sub>·6H<sub>2</sub>O (1.00 g, 1.38 mmol) and *N*-pentylimidazole (1.2 g, 8.32 mmol) in ethanol (25 mL) was stirred for 5 min at room temperature. The excess of ethanol was removed on a rotary evaporator and the product was dried overnight on a vacuum line, yielding a pale pink solid product (yield 1.93 g; 97 %). Melting point: 56 °C. FTIR (ATR,  $\nu_{\text{max}}/\text{cm}^{-1}$ ): 3133 (CH), 2957 (CH), 2935 (CH), 2867 (CH), 1524 (ring), 1469 (ring), 1351 (SO<sub>2</sub>), 1338 (ring), 1286 (CH), 1226 (CF<sub>3</sub>), 1193 (CF<sub>3</sub>), 1180 (CF<sub>3</sub>), 1140 (SO<sub>2</sub>), 1107 (ring), 1086 (CH), 1054 (SNS), 936 (ring), 834 (CH), 793 (CS), 764 (CH), 733 (CF<sub>3</sub>), 664 (ring), 615, 568 (CF<sub>3</sub>), 513 (CF<sub>3</sub>), 408 (SO<sub>2</sub>). CHN found (calculated for C<sub>52</sub>H<sub>84</sub>CoF<sub>12</sub>N<sub>14</sub>O<sub>8</sub>S<sub>4</sub>): C 43.19 (43.12) %, H 5.16 (5.35) %, N 13.54 (13.54) %.

### 1.7 [Co(HeIm)<sub>6</sub>][Tf<sub>2</sub>N]<sub>2</sub>

A solution of Co(Tf<sub>2</sub>N)<sub>2</sub>·6H<sub>2</sub>O (1.00 g, 1.38 mmol) and *N*-hexylimidazole (1.27 g, 8.32 mmol) in ethanol (25 mL) was stirred for 5 min at room temperature. The excess of ethanol was removed on a rotary evaporator and the product was dried overnight on a vacuum line, yielding a pink undercooled liquid (yield 2.09 g; 99 %). Melting point: 27 °C. FTIR (ATR,  $\nu_{\text{max}}/\text{cm}^{-1}$ ): 3133 (CH), 2957 (CH), 2932 (CH), 2861 (CH), 1516 (ring), 1457 (ring), 1350 (SO<sub>2</sub>), 1333 (ring), 1284 (CH), 1229 (CF<sub>3</sub>), 1180 (CF<sub>3</sub>), 1134 (SO<sub>2</sub>), 1108 (ring), 1088 (CH), 1056 (SNS), 937 (ring), 827 (CH), 787 (CS), 738 (CF<sub>3</sub>), 664 (ring), 615, 600, 569 (CF<sub>3</sub>), 511 (CF<sub>3</sub>), 406 (SO<sub>2</sub>). CHN found (calculated for C<sub>58</sub>H<sub>96</sub>CoF<sub>12</sub>N<sub>14</sub>O<sub>8</sub>S<sub>4</sub>): C 45.44 (45.45) %, H 5.66 (5.93) %, N 12.95 (12.79) %.

### 1.8 [Co(HpIm)<sub>6</sub>][Tf<sub>2</sub>N]<sub>2</sub>

A solution of Co(Tf<sub>2</sub>N)<sub>2</sub>·6H<sub>2</sub>O (1.00 g, 1.38 mmol) and *N*-heptylimidazole (1.39 g, 8.32 mmol) in ethanol (25 mL) was stirred for 5 min at room temperature. The excess of ethanol was removed on a rotary evaporator and the product was dried overnight on a vacuum line, yielding a pink undercooled liquid (yield 2.23 g; 100 %). Melting point: 26 °C. FTIR (ATR,  $\nu_{\text{max}}/\text{cm}^{-1}$ ): 3133 (CH), 2929 (CH), 2859 (CH), 1516 (ring), 1458 (ring), 1350 (SO<sub>2</sub>), 1333 (ring), 1289 (CH), 1228 (CF<sub>3</sub>), 1182 (CF<sub>3</sub>), 1137 (SO<sub>2</sub>), 1107 (ring), 1088 (CH), 1057 (SNS), 937 (ring), 827 (CH), 787 (CS), 739 (CF<sub>3</sub>), 665 (ring), 615, 600, 570 (CF<sub>3</sub>), 512 (CF<sub>3</sub>). CHN found (calculated for C<sub>64</sub>H<sub>108</sub>CoF<sub>12</sub>N<sub>14</sub>O<sub>8</sub>S<sub>4</sub>): C 47.75 (47.54) %, H 6.78 (6.73) %, N 12.31 (12.13) %.

### 1.9 [Co(OcIm)<sub>6</sub>][Tf<sub>2</sub>N]<sub>2</sub>

A solution of Co(Tf<sub>2</sub>N)<sub>2</sub>·6H<sub>2</sub>O (1.00 g, 1.38 mmol) and *N*-octylimidazole (1.50 g, 8.32 mmol) in ethanol (25 mL) was stirred for 5 min at room temperature. The excess of ethanol was removed on a rotary evaporator and the product was dried overnight on a vacuum line, yielding a pink undercooled liquid (yield 2.32 g; 99 %). Melting point: 23 °C. FTIR (ATR,  $\nu_{\text{max}}/\text{cm}^{-1}$ ): 3134 (CH), 2928 (CH), 2858 (CH), 1588 (ring), 1516

(ring), 1458 (ring), 1350 (SO<sub>2</sub>), 1333 (ring), 1285 (CH), 1228 (CF<sub>3</sub>), 1181 (CF<sub>3</sub>), 1137 (SO<sub>2</sub>), 1108 (ring), 1088 (CH), 1056 (SNS), 937 (ring), 828 (CH), 786 (CS), 761, 739 (CF<sub>3</sub>), 665 (ring), 615, 600, 570 (CF<sub>3</sub>), 511 (CF<sub>3</sub>). CHN found (calculated for C<sub>70</sub>H<sub>120</sub>CoF<sub>12</sub>N<sub>14</sub>O<sub>8</sub>S<sub>4</sub>): C 49.71 (49.73) %, H 7.58 (7.31) %, N 11.74 (11.53) %.

#### 1.10 [Co(NoIm)<sub>6</sub>][Tf<sub>2</sub>N]<sub>2</sub>

A solution of Co(Tf<sub>2</sub>N)<sub>2</sub>·6H<sub>2</sub>O (1.00 g, 1.38 mmol) and *N*-nonylimidazole (1.61 g, 8.32 mmol) in ethanol (25 mL) was stirred for 5 min at room temperature. The excess of ethanol was removed on a rotary evaporator and the product was dried overnight on a vacuum line, yielding a pale pink solid product (yield 2.44 g; 99 %). Melting point: 29 °C. FTIR (ATR, ν<sub>max</sub>/cm<sup>-1</sup>): 3132 (CH), 2957 (CH), 2925 (CH), 2856 (CH), 1514 (ring), 1457 (ring), 1350 (SO<sub>2</sub>), 1333 (ring), 1286 (CH), 1230 (CF<sub>3</sub>), 1187 (CF<sub>3</sub>), 1140 (SO<sub>2</sub>), 1108 (ring), 1090 (CH), 1054 (SNS), 938 (ring), 830 (CH), 788 (CS), 762, 738 (CF<sub>3</sub>), 665 (ring), 614, 569 (CF<sub>3</sub>), 513 (CF<sub>3</sub>), 408 (SO<sub>2</sub>). CHN found (calculated for C<sub>76</sub>H<sub>132</sub>CoF<sub>12</sub>N<sub>14</sub>O<sub>8</sub>S<sub>4</sub>): C 51.30 (51.13) %, H 7.90 (7.65) %, N 10.80 (10.98) %.

#### 1.11 [Co(DeIm)<sub>6</sub>][Tf<sub>2</sub>N]<sub>2</sub>

A solution of Co(Tf<sub>2</sub>N)<sub>2</sub>·6H<sub>2</sub>O (1.00 g, 1.38 mmol) and *N*-decylimidazole (1.73 g, 8.32 mmol) in ethanol (25 mL) was stirred for 5 min at room temperature. The excess of ethanol was removed on a rotary evaporator and the product was dried overnight on a vacuum line, yielding a pale pink solid product (yield 2.45 g; 95 %). Melting point: 41 °C. FTIR (ATR, ν<sub>max</sub>/cm<sup>-1</sup>): 3133 (CH), 2957 (CH), 2925 (CH), 2855 (CH), 1514 (ring), 1457 (ring), 1350 (SO<sub>2</sub>), 1333 (ring), 1288 (CH), 1230 (CF<sub>3</sub>), 1190 (CF<sub>3</sub>), 1141 (SO<sub>2</sub>), 1108 (ring), 1090 (CH), 1054 (SNS), 938 (ring), 831 (CH), 818 (CH), 789 (CS), 762, 738 (CF<sub>3</sub>), 664 (ring), 613, 569 (CF<sub>3</sub>), 513 (CF<sub>3</sub>), 408 (SO<sub>2</sub>). CHN found (calculated for C<sub>82</sub>H<sub>144</sub>CoF<sub>12</sub>N<sub>14</sub>O<sub>8</sub>S<sub>4</sub>): C 52.98 (52.69) %, H 8.32 (8.06) %, N 10.28 (10.49) %.

#### 1.12 [Co(UnIm)<sub>6</sub>][Tf<sub>2</sub>N]<sub>2</sub>

A solution of Co(Tf<sub>2</sub>N)<sub>2</sub>·6H<sub>2</sub>O (1.00 g, 1.38 mmol) and *N*-undecylimidazole (1.86 g, 8.32 mmol) in ethanol (25 mL) was stirred for 5 min at room temperature. The excess of ethanol was removed on a rotary evaporator and the product was dried overnight on a vacuum line, yielding a pale pink solid product (yield 2.70 g; 100 %). Melting point: 43 °C. FTIR (ATR, ν<sub>max</sub>/cm<sup>-1</sup>): 3132 (CH), 2957 (CH), 2923 (CH), 2854 (CH), 1514 (ring), 1457 (ring), 1350 (SO<sub>2</sub>), 1333 (ring), 1287 (CH), 1231 (CF<sub>3</sub>), 1198 (CF<sub>3</sub>), 1141 (SO<sub>2</sub>), 1108 (ring), 1091 (CH), 1054 (SNS), 938 (ring), 831 (CH), 817 (CH), 789 (CS), 762, 738 (CF<sub>3</sub>), 665 (ring), 614, 569 (CF<sub>3</sub>), 514 (CF<sub>3</sub>), 410 (SO<sub>2</sub>). CHN found (calculated for C<sub>88</sub>H<sub>156</sub>CoF<sub>12</sub>N<sub>14</sub>O<sub>8</sub>S<sub>4</sub>): C 54.47 (54.21) %, H 8.55 (8.25) %, N 9.82 (10.04) %.

#### 1.13 [Co(DoIm)<sub>6</sub>][Tf<sub>2</sub>N]<sub>2</sub>

A solution of Co(Tf<sub>2</sub>N)<sub>2</sub>·6H<sub>2</sub>O (1.00 g, 1.38 mmol) and *N*-dodecylimidazole (1.96 g, 8.32 mmol) in ethanol (25 mL) was stirred for 5 min at room temperature. The excess of ethanol was removed on a rotary evaporator and the product was dried overnight on a vacuum line, yielding a pale pink solid product (yield 2.78 g; 99 %). Melting point: 43 °C. FTIR (ATR, ν<sub>max</sub>/cm<sup>-1</sup>): 3132 (CH), 2925 (CH), 2854 (CH), 1514 (ring), 1457 (ring), 1350 (SO<sub>2</sub>), 1332 (ring), 1288 (CH), 1230 (CF<sub>3</sub>), 1188 (CF<sub>3</sub>), 1140 (SO<sub>2</sub>), 1108 (ring), 1091 (CH), 1055 (SNS), 938 (ring), 818 (CH), 788 (CS), 762, 738 (CF<sub>3</sub>), 664 (ring), 615, 569 (CF<sub>3</sub>), 513 (CF<sub>3</sub>), 409 (SO<sub>2</sub>). CHN found (calculated for C<sub>94</sub>H<sub>168</sub>CoF<sub>12</sub>N<sub>14</sub>O<sub>8</sub>S<sub>4</sub>): C 55.75 (55.51) %, H 8.85 (8.51) %, N 9.41 (9.62) %.

### 1.14 $\text{Co}(\text{Tf}_2\text{N})_2 \cdot 6\text{H}_2\text{O}$

A solution of cobalt(II) carbonate (9.85 g, 82.809 mmol) and methanesulfonate (14.99 g, 152.86 mmol) in  $\text{H}_2\text{O}$  (50 mL) was stirred at room temperature until the pH was neutral.  $\text{CO}_2$  was released during the reaction. The remaining solids were filtered off and the excess of solvent was removed on a rotary evaporator after which the product was dried overnight at 50 °C on a vacuum line to yield  $[\text{Co}(\text{H}_2\text{O})_6][\text{OMs}]_2$  as a pink crystalline solid (yield 24.55 g; 83 %). FTIR (ATR,  $\nu_{\text{max}}/\text{cm}^{-1}$ ): 3536 ( $\text{H}_2\text{O}$ ), 3375 ( $\text{H}_2\text{O}$ ), 3041 ( $\text{CH}_3$ ), 1624 ( $\text{H}_2\text{O}$ ), 1430 ( $\text{CH}_3$ ), 1331 ( $\text{CH}_3$ ), 1213 ( $\text{SO}_3$ ), 1149, 1052 ( $\text{SO}_3$ ), 978 ( $\text{CH}_3$ ), 786 (CS), 691, 566, 537, 516, 420 ( $\text{SO}_3$ ). CHN found (calculated for  $\text{C}_2\text{H}_{18}\text{CoO}_{12}\text{S}_2$ ): C: 6.44 (6.72) %, H 4.98 (5.08) %, N 0.01 (0.00) %.

### 1.15 $[\text{Co}(\text{MeIm})_6][\text{OMs}]_2$

A solution of  $\text{Co}(\text{OMs})_2 \cdot 6\text{H}_2\text{O}$  (0.50 g, 1.41 mmol) and *N*-methylimidazole (0.71 g, 8.59 mmol) in ethanol (25 mL) was stirred for 5 min at room temperature. The excess of ethanol was removed on a rotary evaporator and the product was dried overnight on a vacuum line, yielding a pale pink solid product (yield 1.04 g; 100 %). Melting point: 190 °C. FTIR (ATR,  $\nu_{\text{max}}/\text{cm}^{-1}$ ): 3117 (CH), 3010 (CH), 2934 (CH), 1636, 1531 (ring), 1517 (ring), 1483 (ring), 1456 (ring), 1422 (ring), 1373 ( $\text{SO}_2$ ), 1334 (ring), 1318, 1288 (CH), 1196, 1089 (CH), 1036 ( $\text{SO}_2$ ), 938 (ring), 863, 829 (CH), 763 (CH), 743, 662 (ring), 620 (ring), 550, 531, 522. CHN found (calculated for  $\text{C}_{26}\text{H}_{42}\text{CoN}_{12}\text{O}_6\text{S}_2$ ): C 42.21 (42.10) %, H 5.78 (5.71) %, N 22.64 (22.66) %.

### 1.16 $[\text{Co}(\text{EtIm})_6][\text{OMs}]_2$

A solution of  $\text{Co}(\text{OMs})_2 \cdot 6\text{H}_2\text{O}$  (0.50 g, 1.41 mmol) and *N*-ethylimidazole (0.81 g, 8.59 mmol) in ethanol (25 mL) was stirred for 5 min at room temperature. The excess of ethanol was removed on a rotary evaporator and the product was dried overnight on a vacuum line, yielding a pale pink solid product (yield 1.16 g; 100 %). Melting point: 131 °C. FTIR (ATR,  $\nu_{\text{max}}/\text{cm}^{-1}$ ): 3118 (CH), 2979 (CH), 1736, 1653, 1517, 1449 (ring), 1385 ( $\text{SO}_2$ ), 1356 (ring), 1321, 1290 (CH), 1197 (CH), 1091 (CH), 1038 ( $\text{SO}_2$ ), 959 (ring), 937 (ring), 869, 831, 764 (CH), 743, 663 (ring), 623 (ring), 550, 523. CHN found (calculated for  $\text{C}_{32}\text{H}_{54}\text{CoN}_{12}\text{O}_6\text{S}_2$ ): C 46.42 (46.54) %, H 6.51 (6.59) %, N 20.54 (20.35) %.

### 1.17 $[\text{Co}(\text{PrIm})_6][\text{OMs}]_2$

A solution of  $\text{Co}(\text{OMs})_2 \cdot 6\text{H}_2\text{O}$  (0.50 g, 1.41 mmol) and *N*-propylimidazole (0.92 g, 8.59 mmol) in ethanol (25 mL) was stirred for 5 min at room temperature. The excess of ethanol was removed on a rotary evaporator and the product was dried overnight on a vacuum line, yielding a pale pink solid product (yield 1.28 g; 100 %). Melting point: 116 °C. FTIR (ATR,  $\nu_{\text{max}}/\text{cm}^{-1}$ ): 3119 (CH), 2964 (CH), 2877 (CH), 1636, 1519 (ring), 1457 (ring), 1420 (ring), 1386 ( $\text{SO}_2$ ), 1321, 1290 (C-H), 1190, 1089 (CH), 1038 ( $\text{SO}_2$ ), 938 (ring), 902, 865, 826 (CH), 800 (CH), 763 (CH), 663 (ring), 622 (ring), 549, 522. CHN found (calculated for  $\text{C}_{38}\text{H}_{66}\text{CoN}_{12}\text{O}_6\text{S}_2$ ): C 50.21 (50.15) %, H 7.36 (7.31) %, N 18.52 (18.47) %. Viscosity at 80 °C: 126 mPa s.

### 1.18 $[\text{Co}(\text{BuIm})_6][\text{OMs}]_2$

A solution of  $\text{Co}(\text{OMs})_2 \cdot 6\text{H}_2\text{O}$  (0.50 g, 1.41 mmol) and *N*-butylimidazole (1.05 g, 8.59 mmol) in ethanol (25 mL) was stirred for 5 min at room temperature. The excess of ethanol was removed on a rotary evaporator and the product was dried overnight on a vacuum line, yielding a pale pink solid product (yield 1.40 g; 100 %). Melting point: 130 °C. FTIR (ATR,  $\nu_{\text{max}}/\text{cm}^{-1}$ ): 3122 (CH), 2958 (CH), 2932 (CH), 2873 (CH), 1636, 1518 (ring), 1458 (ring), 1420 (ring), 1376 ( $\text{SO}_3$ ), 1323, 1305, 1284 (CH), 1228,

1184, 1115, 1091 (CH), 1041 (SO<sub>3</sub>), 937 (ring), 862, 827 (CH), 765 (CH), 736, 665 (ring), 628 (ring), 551, 522, 434. CHN found (calculated for C<sub>44</sub>H<sub>78</sub>CoN<sub>12</sub>O<sub>6</sub>S<sub>2</sub>): C 53.09 (53.15) %, H 7.86 (7.91) %, N 16.94 (16.91) %.

### 1.19 [Co(PeIm)<sub>6</sub>][OMs]<sub>2</sub>

A solution of Co(OMs)<sub>2</sub>·6H<sub>2</sub>O (0.50 g, 1.41 mmol) and *N*-pentylimidazole (1.20 g, 8.59 mmol) in ethanol (25 mL) was stirred for 5 min at room temperature. The excess of ethanol was removed on a rotary evaporator and the product was dried overnight on a vacuum line, yielding a pale pink solid product (yield 1.52 g; 100 %). Melting point: 114 °C. FTIR (ATR,  $\nu_{\text{max}}/\text{cm}^{-1}$ ): 3121 (CH), 2959 (CH), 2931 (CH), 2862 (CH), 1624, 1516 (ring), 1468 (ring), 1456 (ring), 1420 (ring), 1408, 1377 (SO<sub>3</sub>), 1295 (CH), 1231, 1203, 1108, 1089 (CH), 1040 (SO<sub>3</sub>), 997, 938 (ring), 854, 833 (CH), 766 (CH), 733, 665 (ring), 632 (ring), 549, 523, 490. CHN found (calculated for C<sub>50</sub>H<sub>90</sub>CoN<sub>12</sub>O<sub>6</sub>S<sub>2</sub>): C 55.72 (55.69) %, H 8.49 (8.41) %, N 15.67 (15.59) %.

### 1.20 [Co(HeIm)<sub>6</sub>][OMs]<sub>2</sub>

A solution of Co(OMs)<sub>2</sub>·6H<sub>2</sub>O (0.50 g, 1.41 mmol) and *N*-hexylimidazole (1.29 g, 8.59 mmol) in ethanol (25 mL) was stirred for 5 min at room temperature. The excess of ethanol was removed on a rotary evaporator and the product was dried overnight on a vacuum line, yielding a pale pink solid product (yield 1.64 g; 100 %). Melting point: 130 °C. FTIR (ATR,  $\nu_{\text{max}}/\text{cm}^{-1}$ ): 3121 (CH), 2956 (CH), 2927 (CH), 2858 (CH), 1636, 1520 (ring), 1459 (ring), 1408, 1378 (SO<sub>3</sub>), 1321, 1288 (CH), 1225, 1187, 1110, 1092 (CH), 1048 (SO<sub>3</sub>), 1039, 938 (ring), 871, 828 (CH), 764 (CH), 734, 665 (ring), 632 (ring), 549, 521. CHN found (calculated for C<sub>56</sub>H<sub>102</sub>CoN<sub>12</sub>O<sub>6</sub>S<sub>2</sub>): C 57.93 (57.86) %, H 8.97 (8.84) %, N 14.54 (14.46) %. Viscosity at 80 °C: 68 mPa s.

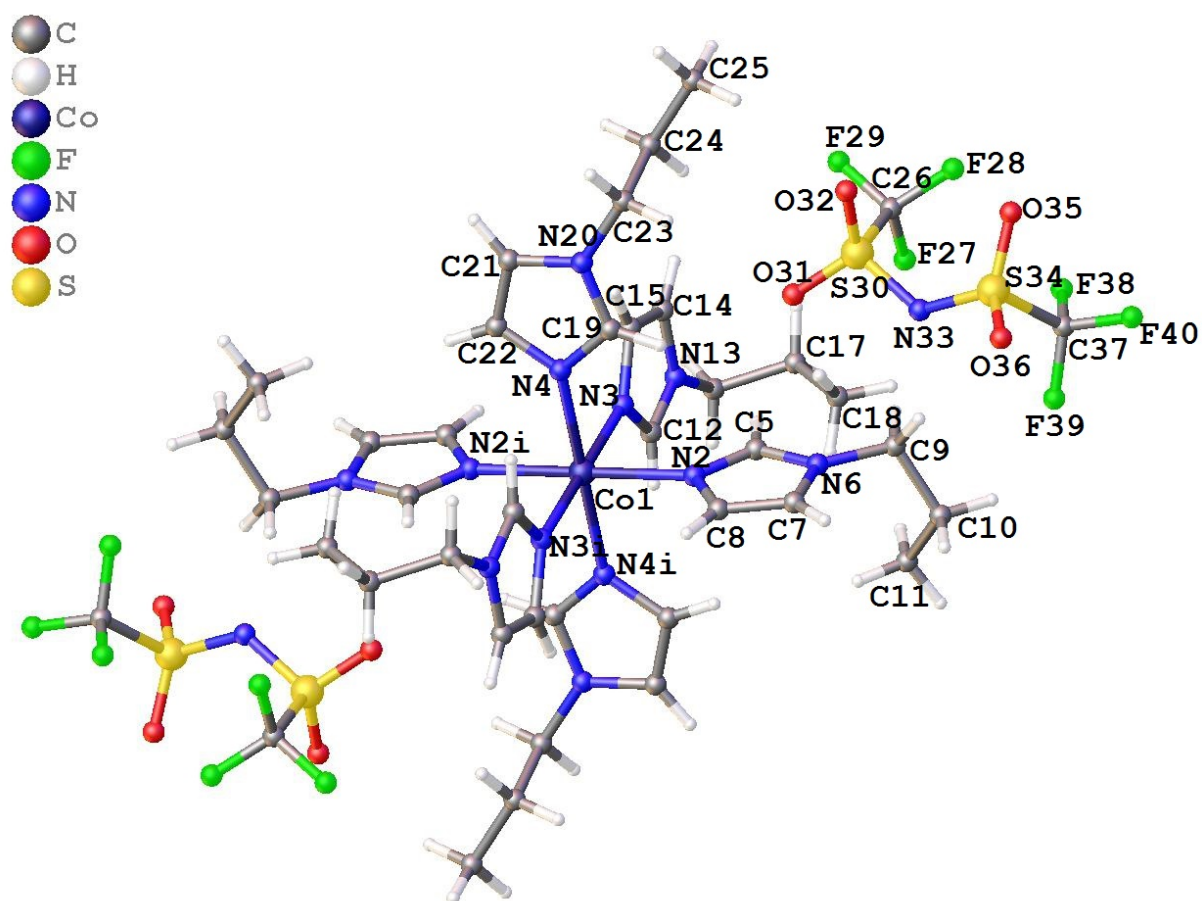

**Figure 1** Crystal structure of  $[\text{Co}(\text{PrIm})_6][\text{Tf}_2\text{N}]_2$ . Symmetry code: (i)  $2-x, -y, 1-z$ .

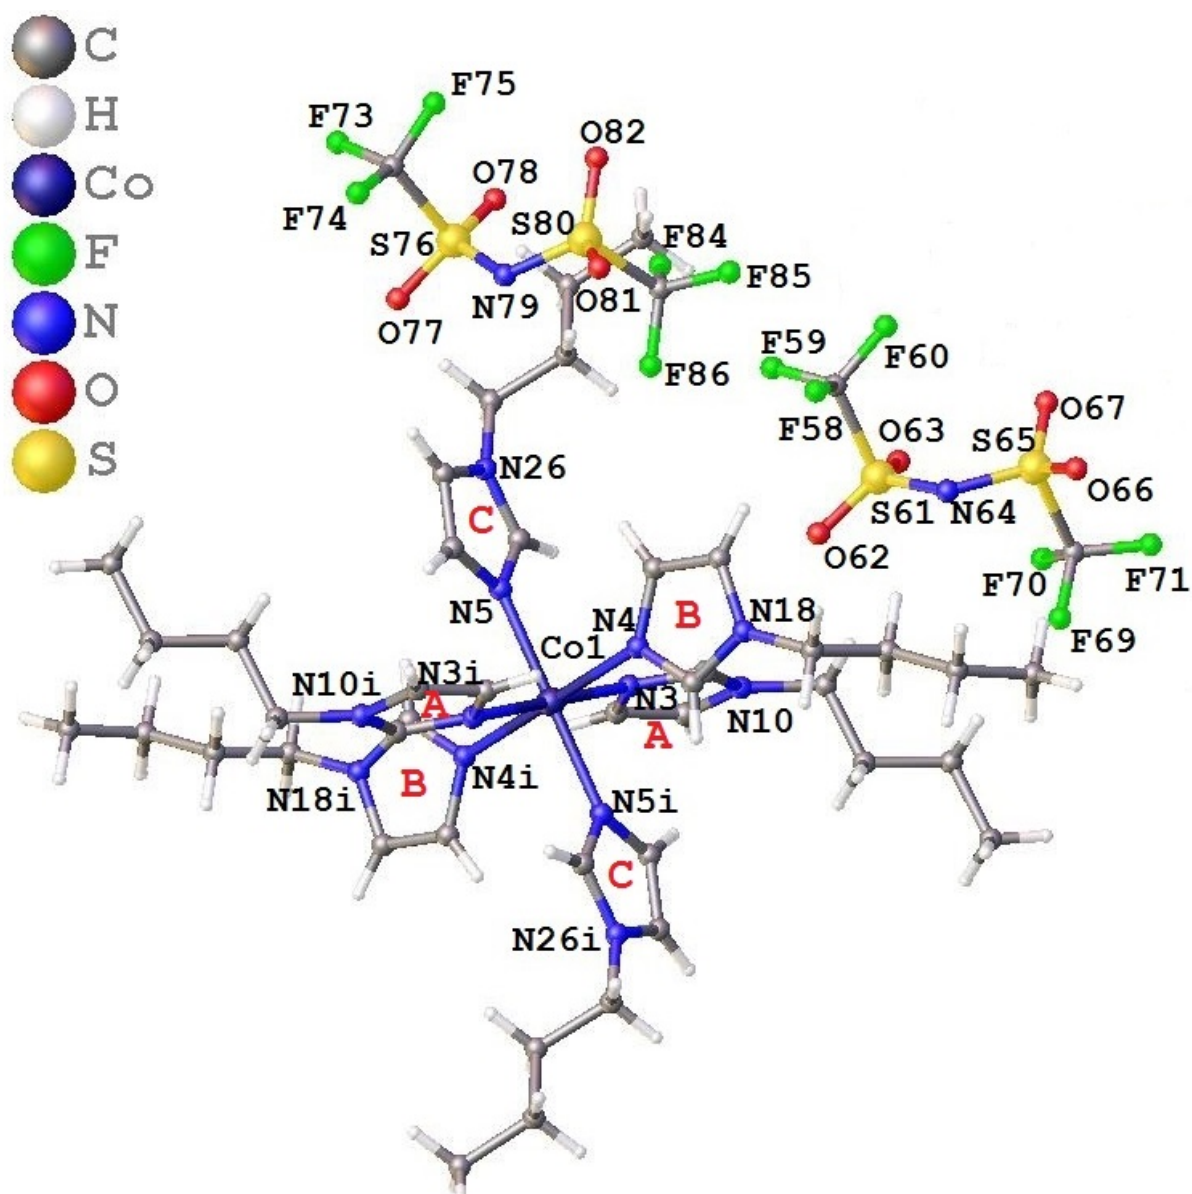

**Figure 2** Crystal structure of  $[\text{Co}(\text{Bulm})_6][\text{Tf}_2\text{N}]_2$ . Symmetry code: (i) -x, 1-y, 1-z.

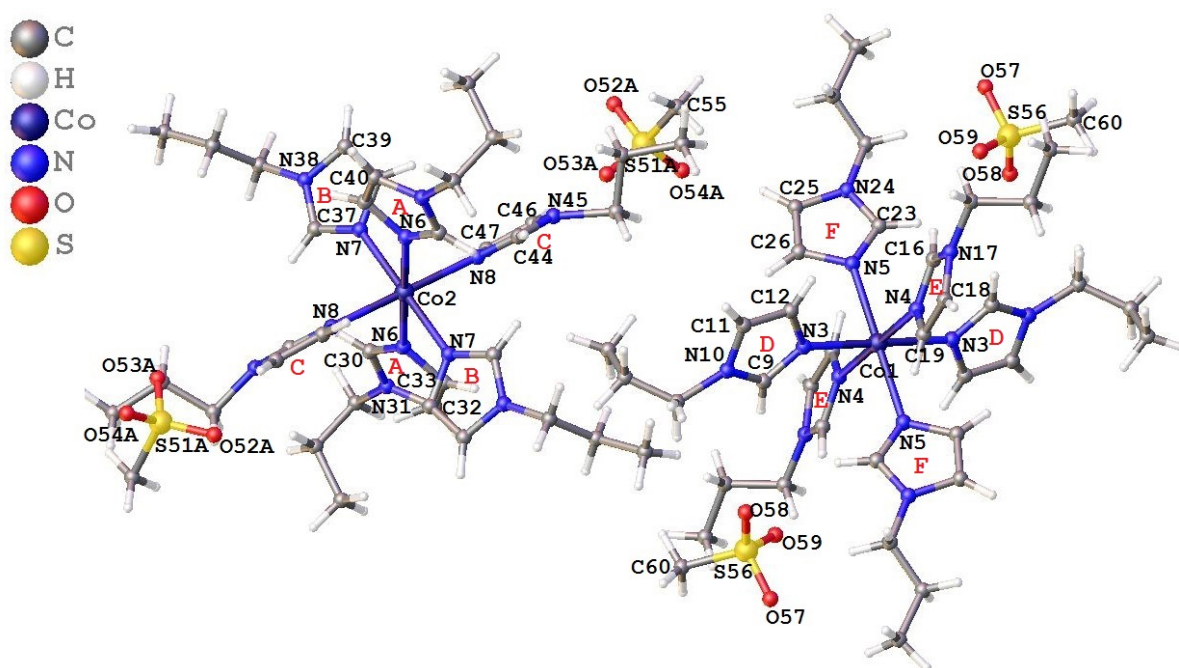

**Figure 3** Crystal structure of  $[\text{Co}(\text{PrIm})_6][\text{OMs}]_2$ . Symmetry code: (i)  $1-x, 1-z, 1-z$ .

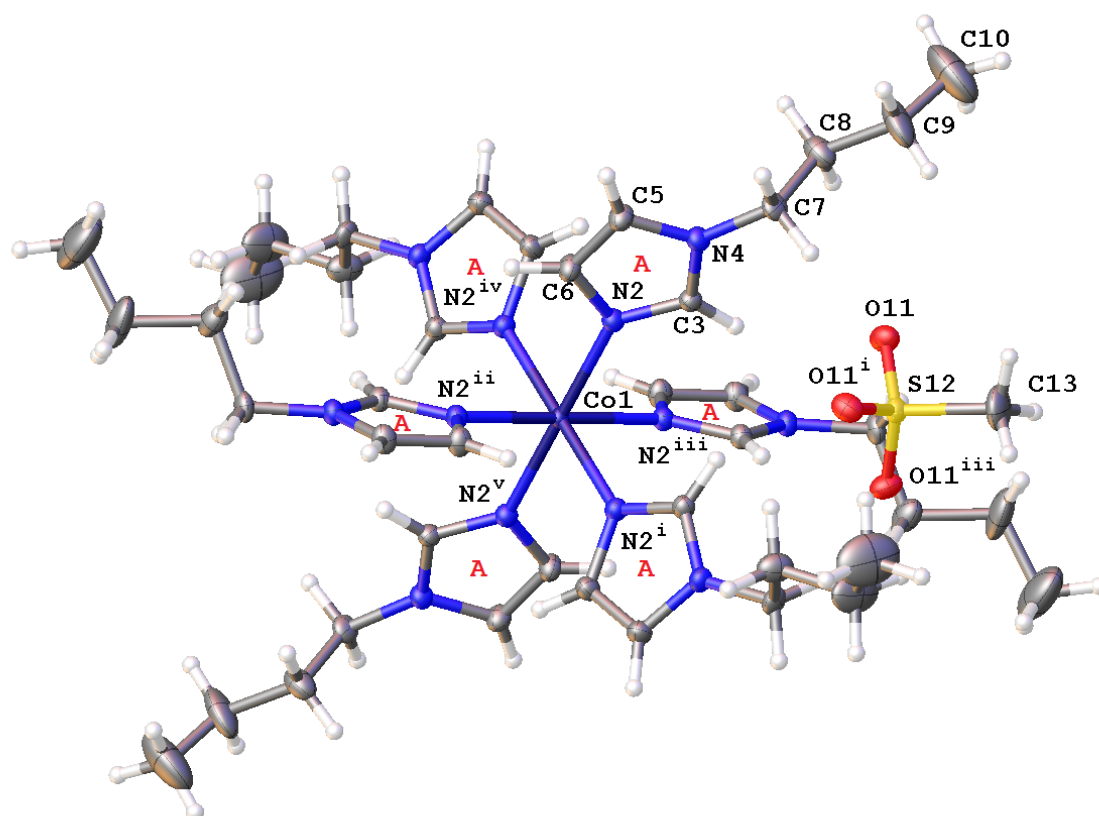

**Figure 4** Crystal structure of  $[\text{Co}(\text{Bulm})_6][\text{OMs}]_2$ . Symmetry codes: (i)  $2-x+y, 1-x, z$  (ii)  $1-y, -1+x, z$  (iii)  $1+y, 1-x+y, 2-z$  (iv)  $2-x, -y, 2-z$  (v)  $x-y, -1+x, 2-z$

**Table 1** Crystal data and structure refinement for the structures of [Co(Etlm)<sub>6</sub>][Tf<sub>2</sub>N]<sub>2</sub>, [Co(PrIm)<sub>6</sub>][Tf<sub>2</sub>N]<sub>2</sub>, [Co(Bulm)<sub>6</sub>][Tf<sub>2</sub>N]<sub>2</sub>, [Co(Etlm)<sub>6</sub>][OMs]<sub>2</sub>, [Co(PrIm)<sub>6</sub>][OMs]<sub>2</sub> and [Co(Bulm)<sub>6</sub>][OMs]<sub>2</sub>

| Compound                                                                  | [Co(Etlm) <sub>6</sub> ]<br>[Tf <sub>2</sub> N] <sub>2</sub>                                        | [Co(PrIm) <sub>6</sub> ]<br>[Tf <sub>2</sub> N] <sub>2</sub>                                        | [Co(Bulm) <sub>6</sub> ]<br>[Tf <sub>2</sub> N] <sub>2</sub>                                        | [Co(Etlm) <sub>6</sub> ]<br>[OMs] <sub>2</sub>                                                     | [Co(PrIm) <sub>6</sub> ]<br>[OMs] <sub>2</sub>                                   | [Co(Bulm) <sub>6</sub> ]<br>[OMs] <sub>2</sub>                                   |
|---------------------------------------------------------------------------|-----------------------------------------------------------------------------------------------------|-----------------------------------------------------------------------------------------------------|-----------------------------------------------------------------------------------------------------|----------------------------------------------------------------------------------------------------|----------------------------------------------------------------------------------|----------------------------------------------------------------------------------|
| Empirical formula                                                         | C <sub>34</sub> H <sub>48</sub> Co<br>F <sub>12</sub> N <sub>14</sub> O <sub>8</sub> S <sub>4</sub> | C <sub>40</sub> H <sub>60</sub> Co<br>F <sub>12</sub> N <sub>14</sub> O <sub>8</sub> S <sub>4</sub> | C <sub>46</sub> H <sub>71</sub> Co<br>F <sub>12</sub> N <sub>14</sub> O <sub>8</sub> S <sub>4</sub> | C <sub>48</sub> H <sub>81</sub> Co <sub>1.5</sub><br>N <sub>18</sub> O <sub>9</sub> S <sub>3</sub> | C <sub>38</sub> H <sub>66</sub> Co N <sub>12</sub> O <sub>6</sub> S <sub>2</sub> | C <sub>44</sub> H <sub>78</sub> Co N <sub>12</sub> O <sub>6</sub> S <sub>2</sub> |
| Formula weight                                                            | 1196.03                                                                                             | 1280.19                                                                                             | 1363.33                                                                                             | 1238.88                                                                                            | 910.07                                                                           | 994.23                                                                           |
| Temperature/K                                                             | 100(2)                                                                                              | 100(2)                                                                                              | 100(2)                                                                                              | 99.9(2)                                                                                            | 250.01(10)                                                                       | 100(2)                                                                           |
| Color                                                                     | pink                                                                                                | pink                                                                                                | pink                                                                                                | pink                                                                                               | pink                                                                             | pink                                                                             |
| Size/mm <sup>3</sup>                                                      | 0.19 x 0.14 x 0.1                                                                                   | 0.19 x 0.16 x 0.15                                                                                  | 0.16 x 0.09 x 0.08                                                                                  | 0.40 x 0.08 x 0.07                                                                                 | 0.24 x 0.12 x 0.12                                                               | 0.24 x 0.15 x 0.04                                                               |
| Crystal system                                                            | Monoclinic                                                                                          | Monoclinic                                                                                          | Triclinic                                                                                           | Monoclinic                                                                                         | Triclinic                                                                        | Trigonal                                                                         |
| Space group                                                               | <i>P</i> 2 <sub>1</sub> / <i>c</i> (no.14)                                                          | <i>P</i> 2 <sub>1</sub> / <i>c</i> (no.14)                                                          | <i>P</i> 1̄ (no.2)                                                                                  | <i>P</i> 2 <sub>1</sub> / <i>c</i> (no.14)                                                         | <i>P</i> 1̄ (no.2)                                                               | <i>R</i> 3̄ (no.148)                                                             |
| <i>a</i> /Å                                                               | 11.0532(5)                                                                                          | 11.15538(16)                                                                                        | 9.6957(3)                                                                                           | 23.6765(7)                                                                                         | 8.8446(3)                                                                        | 13.4995(7)                                                                       |
| <i>b</i> /Å                                                               | 11.1257(5)                                                                                          | 12.3581(3)                                                                                          | 17.4965(6)                                                                                          | 12.9804(4)                                                                                         | 15.7075(6)                                                                       | 13.4995(7)                                                                       |
| <i>c</i> /Å                                                               | 20.1637(10)                                                                                         | 21.4046(3)                                                                                          | 18.8465(6)                                                                                          | 21.7673(7)                                                                                         | 17.6599(7)                                                                       | 25.8633(14)                                                                      |
| <i>α</i> /°                                                               | 90                                                                                                  | 90                                                                                                  | 88.258(3)                                                                                           | 90                                                                                                 | 88.763(3)                                                                        | 90                                                                               |
| <i>β</i> /°                                                               | 98.154(5)                                                                                           | 101.7361(15)                                                                                        | 89.339(3)                                                                                           | 112.358(4)                                                                                         | 80.229(3)                                                                        | 90                                                                               |
| <i>γ</i> /°                                                               | 90                                                                                                  | 90                                                                                                  | 80.363(3)                                                                                           | 90                                                                                                 | 85.243(3)                                                                        | 120                                                                              |
| Volume/Å <sup>3</sup>                                                     | 2454.6(2)                                                                                           | 2889.14(9)                                                                                          | 3150.49(19)                                                                                         | 6186.8(4)                                                                                          | 2409.44(16)                                                                      | 4081.8(5)                                                                        |
| <i>Z</i>                                                                  | 2                                                                                                   | 2                                                                                                   | 2                                                                                                   | 4                                                                                                  | 2                                                                                | 3                                                                                |
| <i>P</i> <sub>calc</sub> / Mg·m <sup>-3</sup>                             | 1.618                                                                                               | 1.472                                                                                               | 1.437                                                                                               | 1.330                                                                                              | 1.254                                                                            | 1.213                                                                            |
| <i>μ</i> /mm <sup>-1</sup>                                                | 0.628                                                                                               | 0.539                                                                                               | 0.499                                                                                               | 0.573                                                                                              | 0.497                                                                            | 0.445                                                                            |
| Wavelength/Å                                                              | 0.71073                                                                                             | 0.71073                                                                                             | 0.71073                                                                                             | 0.71073                                                                                            | 0.71073                                                                          | 0.71073                                                                          |
| Reflections collected                                                     | 10709                                                                                               | 12615                                                                                               | 24409                                                                                               | 28716                                                                                              | 19415                                                                            | 6466                                                                             |
| Independent refl.                                                         | 5012                                                                                                | 5886                                                                                                | 12848                                                                                               | 12644                                                                                              | 9822                                                                             | 1863                                                                             |
| <i>R</i> (int)                                                            | 0.0460                                                                                              | 0.0302                                                                                              | 0.0181                                                                                              | 0.0217                                                                                             | 0.0204                                                                           | 0.0160                                                                           |
| <i>R</i> <sub>1</sub> [ <i>I</i> ≥ 2σ( <i>I</i> )]                        | 0.0305                                                                                              | 0.0624                                                                                              | 0.0352                                                                                              | 0.0368                                                                                             | 0.0621                                                                           | 0.0441                                                                           |
| <i>wR</i> <sub>2</sub> [all data]                                         | 0.0717                                                                                              | 0.0648                                                                                              | 0.0844                                                                                              | 0.0921                                                                                             | 0.1852                                                                           | 0.1176                                                                           |
| <i>δ</i> <sub><i>P</i><sub>max</sub>, <i>min</i></sub> /e Å <sup>-3</sup> | 0.43/-0.43                                                                                          | 0.39/-0.33                                                                                          | 0.85/-0.42                                                                                          | 1.23/-0.56                                                                                         | 0.76/-0.50                                                                       | 1.44/-0.45                                                                       |

**Table 2** Non-classical hydrogen bonds C-H...X and C-H...  $\pi$  in [Co(EtIm)<sub>6</sub>][Tf<sub>2</sub>N]<sub>2</sub> and [Co(PrIm)<sub>6</sub>][Tf<sub>2</sub>N]<sub>2</sub>. Labels of atoms and planes as shown in Figures 2 and S1.

| Compound                                                 | Interaction       | Distance (Å) | Symmetry Operation |
|----------------------------------------------------------|-------------------|--------------|--------------------|
| [Co(EtIm) <sub>6</sub> ][Tf <sub>2</sub> N] <sub>2</sub> | C8-H8...ring B    | 3.6108(19)   | x, y, z            |
|                                                          | C10-H10B...ring A | 3.499(2)     | 1-x, 1-y, 1-z      |
|                                                          | C14-H14...ring C  | 3.6169(19)   | x, y, z            |
|                                                          | C20-H20...ring A  | 3.4036(19)   | -x, 1-y, -z        |
|                                                          | S31-O32...ring B  | 3.9875(16)   | -x, 1-y, -x        |
|                                                          | S31-O33...ring C  | 3.4930(14)   | x, 1/2-y, -1/2+z   |
|                                                          | C5-H5...O32       | 3.236(2)     | x, y, z            |
|                                                          | C11-H11...O29     | 3.362(2)     | -x, 1-y, -z        |
|                                                          | C14-H14...O33     | 3.386(2)     | x, 1/2-y, 1/2+z    |
|                                                          | C19-H19...O29     | 3.297(2)     | -x, -y, -z         |
| [Co(PrIm) <sub>6</sub> ][Tf <sub>2</sub> N] <sub>2</sub> | C5-H5...ring B    | 3.6584(15)   | x, y, z            |
|                                                          | C15-H15...ring C  | 3.5912(16)   | x, y, z            |
|                                                          | C22-H22...ring A  | 3.7115(16)   | 2-x, -y, 1-z       |
|                                                          | S30-O31...ring A  | 3.5378(13)   | x, y, z            |
|                                                          | S30-O32...ring C  | 3.3158(12)   | 1-x, -y, 1-z       |
|                                                          | C7-H7...O36       | 3.352(2)     | 1-x, 1-y, 1-z      |
|                                                          | C9-H9A...O32      | 3.513(2)     | x, y, z            |
|                                                          | C12-H12...O32     | 3.1855(19)   | 1+x, y, z          |
|                                                          | C12-H12...N4      | 3.1450(17)   | 2-x, -y, 1-z       |
|                                                          | C14-H14...O35     | 3.3804(18)   | 1-x, -1/2+y, 1/2-z |
|                                                          | C19-H19...O31     | 3.3718(17)   | x, y, z            |

**Table 3** Non-classical hydrogen bonds C-H...X and C-H...  $\pi$  in [Co(Bulm)<sub>6</sub>][Tf<sub>2</sub>N]<sub>2</sub>. Labels of atoms and planes as shown in Figure S2.

| Compound                                                 | Interaction      | Distance (Å) | Symmetry Operation |
|----------------------------------------------------------|------------------|--------------|--------------------|
| [Co(Bulm) <sub>6</sub> ][Tf <sub>2</sub> N] <sub>2</sub> | ring B - ring B  | 4.1947(11)   | 1-x, 1-y, 1-z      |
|                                                          | ring E - ring E  | 4.3267(11)   | 1-x, -y, -z        |
|                                                          | C20-H20...ring C | 3.559(2)     | x, y, z            |
|                                                          | C28-H28...ring A | 3.470(2)     | -x, 1-y, 1-z       |
|                                                          | C44-H44...ring D | 3.353(2)     | x, y, z            |
|                                                          | C49-H49...ring E | 3.633(2)     | x, y, z            |
|                                                          | S61-O62...ring B | 3.649(2)     | x, y, z            |
|                                                          | S65-O67...ring E | 3.5627(16)   | x, y, z            |
|                                                          | S80-O81...ring C | 3.3810(17)   | 1+x, y, z          |
|                                                          | C17-H17...O81    | 3.299(2)     | 1-x, 1-y, 1-z      |
|                                                          | C27-H27...O77    | 3.223(3)     | x, y, z            |
|                                                          | C30-H30B...F84   | 3.391(2)     | x, y, z            |
|                                                          | C35-H35...O82    | 3.288(2)     | x, -1+y, z         |
|                                                          | C37-H37B...O77   | 3.277(2)     | 1+x, -1+y, z       |
|                                                          | C41-H41...O78    | 3.332(2)     | 1-x, 1-y, -z       |
|                                                          | C45-H45B...O78   | 3.364(3)     | 1-x, 1-y, -z       |
|                                                          | C51-H51...O63    | 3.368(2)     | 1+x, y, z          |

**Table 4** Non-classical hydrogen bonds C-H...X and C-H...  $\pi$  in [Co(EtIm)<sub>6</sub>][OMs]<sub>2</sub>. Labels of atoms and planes as shown in Figure 3.

| Compound                                   | Interaction        | Distance (Å) | Symmetry Operation |
|--------------------------------------------|--------------------|--------------|--------------------|
| [Co(EtIm) <sub>6</sub> ][OMs] <sub>2</sub> | C27-H27... ring E  | 3.454(2)     | x, y, z            |
|                                            | C33-H33... ring C  | 3.570(2)     | x, y, z            |
|                                            | C35-H35C... ring B | 3.753(3)     | 1-x, 1/2+y, 1/2-z  |
|                                            | C39-H39... ring A  | 3.640(2)     | x, y, z            |
|                                            | C51-H51... ring H  | 3.675(2)     | 1-x, 1/2+y, 1/2-z  |
|                                            | C57-H57... ring I  | 3.635(2)     | x, y, z            |
|                                            | C12-H12... O72     | 3.086(3)     | 1-x, -1/2+y, 1/2-z |
|                                            | C17-H17A... O78    | 3.280(3)     | 1-x, -1/2+y, 1/2-z |
|                                            | C18-H18... O72     | 3.361(3)     | 1-x, -1/2+y, 1/2-z |
|                                            | C20-H20... O67     | 3.371(3)     | 1-x, -1/2+y, 1/2-z |
|                                            | C24-H24... O72     | 3.317(3)     | 1-x, 1/2+y, 1/2-z  |
|                                            | C26-H26... O69     | 3.179(3)     | x, y, z            |
|                                            | C27-H27... N7      | 3.063(3)     |                    |
|                                            | C28-H28A... 74     | 3.348(3)     | 1-x, -1/2+y, 1/2-z |
|                                            | C30-H30... O68     | 3.326(3)     | 1-x, 1-y, 1-z      |
|                                            | C32-H32... O74     | 3.320(3)     | x, y, z            |
|                                            | C38-H38... O73     | 3.211(3)     | 1-x, 1-y, 1-z      |
|                                            | C46-H46A... O78    | 3.232(3)     | 1-x, 1/2+y, 1/2-z  |
|                                            | C50-H50... O77     | 3.285(3)     | 2-x, 1-y, 1-z      |
|                                            | C50-H50... O78     | 3.431(3)     | 2-x, 1-y, 1-z      |
|                                            | C54-H54... O79     | 3.129(3)     | x, 1/2-y, 1/2+z    |
| [Co(PrIm) <sub>6</sub> ][OMs] <sub>2</sub> | C58-H58A... O77A   | 3.392(10)    | x, 1/2-y, 1/2+z    |
|                                            | C62-H62... O72     | 3.335(3)     | x, 3/2-y, 1/2+z    |
|                                            | C64-H64A... O73    | 3.215(3)     | x, 3/2-y, 1/2+z    |
|                                            | C64-H64B... O77    | 3.263(3)     | 2-x, 1/2+y, 3/2-z  |
|                                            | C75-H75B... O68    | 3.318(3)     | x, 1/2-y, -1/2+z   |

**Table 5** Non-classical hydrogen bonds C-H...X and C-H...  $\pi$  in [Co(PrIm)<sub>6</sub>][OMs]<sub>2</sub> and [Co(BulIm)<sub>6</sub>][OMs]<sub>2</sub>. Labels of atoms and planes as shown in Figures S3 and S4.

| Compound                                    | Interaction       | Distance (Å) | Symmetry Operation     |
|---------------------------------------------|-------------------|--------------|------------------------|
| [Co(PrIm) <sub>6</sub> ][OMs] <sub>2</sub>  | C13-H13... ring C | 3.692(11)    | x, y, z                |
|                                             | C19-H19... ring F | 3.470(4)     | 1-x, 4-y, 1-z          |
|                                             | C16-H16... O59    | 3.167(6)     | x, y, z                |
|                                             | C18-H18... O58    | 3.291(6)     | 1+x, y, z              |
|                                             | C20-H20B... O59   | 3.293(6)     | x, y, z                |
|                                             | C25-H25... O54    | 3.314(5)     | x, y, z                |
|                                             | C30-H30... O52    | 3.136(8)     | 1-x, 2-y, -z           |
|                                             | C37-H37... O52    | 3.248(9)     | 1+x, y, z              |
|                                             | C39-H39... O57    | 3.172(7)     | 1+x, 1+y, z            |
|                                             | C41-H41A... O53   | 3.366(10)    | 1+x, y, z              |
|                                             | C44-H44... O52    | 3.370(11)    | 1+x, y, z              |
|                                             | C44-H44... O52A   | 3.082(10)    | x, y, z                |
|                                             | C46-H46... O53A   | 3.190(10)    |                        |
|                                             | C49-H49A... O53   | 3.361(12)    | x, y, z                |
| [Co(BulIm) <sub>6</sub> ][OMs] <sub>2</sub> | C3-H3... O11      | 3.293(3)     | x, y, z                |
|                                             | C5-H5... O11      | 3.225(3)     | 2/3+x-y, -4/3+x, 5/3-z |
